# Supplementary material for: Combined short-term and long-term emission controls improve air quality sustainably in China
Source: PubMed Central journal article supplement (PMC11183230; doi:10.1038/s41467-024-49539-9), 2024-06-17
Supplement: 41467_2024_49539_MOESM1_ESM.pdf [file 41467_2024_49539_MOESM1_ESM.pdf]

1 **Combined short-term and long-term emission controls improve air**  
2 **quality sustainably in China**

3 Zhang Wen<sup>1,2#</sup>, Xin Ma<sup>1,#</sup>, Wen Xu<sup>1,#</sup>, Ruotong Si<sup>1</sup>, Lei Liu<sup>1,3</sup>, Mingrui Ma<sup>4</sup>,  
4 Yuanhong Zhao<sup>5</sup>, Aohan Tang<sup>1</sup>, Yangyang Zhang<sup>1</sup>, Kai Wang<sup>1</sup>, Ying Zhang<sup>1</sup>, Jianlin  
5 Shen<sup>6</sup>, Lin Zhang<sup>7</sup>, Yu Zhao<sup>4</sup>, Fusuo Zhang<sup>1</sup>, Keith Goulding<sup>8</sup>, Xuejun Liu<sup>1,\*</sup>

6 <sup>1</sup>State Key Laboratory of Nutrient Use and Management, College of Resources and  
7 Environmental Sciences, National Academy of Agriculture Green Development, China  
8 Agricultural University, Beijing 100193, China

9 <sup>2</sup>State Environmental Protection Key Laboratory of Environmental Pollution and Greenhouse  
10 Gases Co-control, Chinese Academy of Environmental Planning, Beijing 100041, China

11 <sup>3</sup>College of Earth and Environmental Sciences, Lanzhou University, Lanzhou 730000, China

12 <sup>4</sup>State Key Laboratory of Pollution Control & Resource Reuse and School of Environment,  
13 Nanjing University, Nanjing 210008, China

14 <sup>5</sup>College of Oceanic and Atmospheric Sciences, Ocean University of China, Qingdao 266100,  
15 China

16 <sup>6</sup>Institute of Subtropical Agriculture, Chinese Academy of Sciences, Changsha 410125, China

17 <sup>7</sup>Laboratory for Climate and Ocean-Atmosphere Studies, Department of Atmospheric and  
18 Oceanic Sciences, School of Physics, Peking University, Beijing 100871, China

19 <sup>8</sup>Sustainable Soils and Crops, Rothamsted Research, Harpenden AL5 2JQ, UK

20  
21 # These authors contribute to this work equally.

22 *Correspondence to:* Xuejun Liu ([liu310@cau.edu.cn](mailto:liu310@cau.edu.cn))

23

24

25 **Note S1** Difference-in-Differences (DID) method

26 We used the DID method to quantitatively examine whether and to what extent the  
27 short-term emission control measures influenced long-term policies. DID recognizes  
28 the NC1(Beijing) as the treatment group, while the other sites are regarded as the  
29 control group. Differences for each group in PM<sub>2.5</sub> concentrations, oxidized N  
30 deposition, reduced N deposition during APEC, and Parade (emissions data of  
31 Olympics events were lacking, and the limited data available after the implementation  
32 of short-term measures during the BRS period was therefore not used in the assessment)  
33 when compared before and after the implementation of short-term measures are then  
34 calculated. According to the Random Forest assessment (in Methods), the important  
35 variables were found to be emission data (SO<sub>2</sub> emission, NO<sub>x</sub> emission, NH<sub>3</sub> emission),  
36 meteorological parameters (2m temperature, atmospheric pressure, 10m wind speed,  
37 boundary layer height) and NDVI. The changes in these differences thus represent the  
38 net effect on PM<sub>2.5</sub> concentration, oxidized N deposition, and reduced N deposition  
39 brought by the short-term measures, and statistically significant differences were set at  
40  $p$  values  $< 0.05$ . The DID method requires there to be a similarity between the treatment  
41 group and the control group. In response to this, parallel trends were tested by the event  
42 analysis method and  $p$  values  $> 0.05$  indicated that there was similarity. All actions were  
43 performed in Stata MP version 18.

44

45 **Note S2** The assessment of “NH<sub>3</sub>-rich” or “NH<sub>3</sub>-poor”

46 The “NH<sub>3</sub>-rich atmospheric environment” here represents a relatively high  
47 concentration of NH<sub>3</sub> in the atmosphere. We added the categorization of “NH<sub>3</sub>-rich” or  
48 “NH<sub>3</sub>-poor” to further quantify the degree of “NH<sub>3</sub>-richness”<sup>1</sup>. The equations as follows:

49 
$$AdjGR = \frac{\text{free ammonia}}{\text{total nitrate}} = \frac{TA-DSN \times TS}{TN} = \frac{[NH_3](g) + [NO_3^-](p)}{[NO_3^-](p) + [HNO_3](g)} \quad (1)$$

50 
$$DSN = \frac{[NH_4^+](p) - [NO_3^-](p)}{[SO_4^{2-}](p)} \quad (2)$$

51 
$$TA = [NH_3](g) + [NH_4^+](p) \quad (3)$$

52 
$$TN = [HNO_3](g) + [NO_3^-](p) \quad (4)$$

53 
$$TS = [SO_2](g) + [SO_4^{2-}](p) \quad (5)$$

54 The concentration unit of gaseous and particulate pollutants is μmol m<sup>-3</sup>. Where an  
55 *AdjGR* of <1 indicates an NH<sub>3</sub>-poor regime, where small perturbations in NH<sub>3</sub>  
56 emissions would have a significant effect on SIAs. Likewise, an *AdjGR* of >1 indicates  
57 NH<sub>3</sub>-rich conditions with a free NH<sub>3</sub> ratio capable of neutralizing excess HNO<sub>3</sub>  
58 produced by the additional increase in NO<sub>x</sub> emission.

59 The national average value of *AdjGR* is 3.24, which is more than 1, so we consider  
60 that our country generally has an NH<sub>3</sub>-rich atmospheric environment.

61

62 **Note S3** Sample collection and processing

63 Samplers for collecting Nr gases and particulates were placed 2 m above the ground.  
64 The adsorbents for NH<sub>3</sub> and pNH<sub>4</sub><sup>+</sup> were citric acid or phosphoric acid; those for HNO<sub>3</sub>  
65 and pNO<sub>3</sub> were potassium hydroxide and for NO<sub>2</sub> we used triethanolamine.  
66 Precipitation samples were collected in a funnel-shaped glass bucket, and a graduated  
67 cylinder was used to measure the precipitation amount. After each precipitation event  
68 (8:00 am-8:00 am the next day), the collected samples were transferred into a 50 ml  
69 clean polyethylene bottle and the rain gauge was cleaned with high-purity water to  
70 avoid cross-contamination.

71 Gaseous and particulate Nr samples were collected monthly. After sampling, all  
72 exposed samplers and samples were returned to the laboratory at China Agricultural  
73 University for chemical analysis. DELTA samplers and passive samples were stored at  
74 4°C before analysis. HNO<sub>3</sub> denuders and alkaline-coated filters were extracted with 10  
75 mL 0.05% H<sub>2</sub>O<sub>2</sub>. High-purity water was used to extract the NH<sub>3</sub> denuders, acid-coated  
76 filters, and ALPHA samplers. NH<sub>4</sub><sup>+</sup> and NO<sub>3</sub><sup>-</sup> in the extracts were measured using an  
77 AA3 continuous-flow analyzer (Bran + Luebbe GmbH, Norderstedt, Germany). The  
78 Gradko samplers were extracted with an aqueous solution containing sulfanilamide,  
79 phosphoric acid, and N-1-Naphthylethylene-diamine and analyzed for NO<sub>2</sub><sup>-</sup>  
80 colorimetrically at a wavelength of 542 nm. Laboratory and field blanks were co-  
81 processed to calibrate the samples in every experiment.

82 Each collected precipitation sample was filtered using a 0.45 μm syringe and 10 ml  
83 of filtrate was retained. NH<sub>4</sub><sup>+</sup>-N and NO<sub>3</sub><sup>-</sup>-N in the filtrate were determined on the AA3

84 continuous-flow analyzer described above.

85

86 **Note S4** Simulation of dry deposition velocities of Nr species

87 The dry deposition of gaseous and particulate Nr species was calculated by  
88 multiplying measured concentrations with simulated deposition velocities ( $V_d$ ) from  
89 the GEOS (Goddard Earth Observing System)-Chem chemical transport model  
90 (<http://geos-chem.org>). The model is driven by GEOS (Goddard Earth Observing  
91 System) assimilated meteorological data from the NASA Global Modeling and  
92 Assimilation Office (GMAO). GEOS-5 data are available with a temporal resolution of  
93 6 h (3 h for surface variables and mixing depths) and a horizontal resolution of  $1/2^\circ$   
94 latitude  $\times$   $2/3^\circ$  longitude. The nested-grid version of GEOS-Chem was used with the  
95 native  $1/2^\circ \times 2/3^\circ$  resolution over East Asia ( $70^\circ\text{E}$ – $150^\circ\text{E}$ ,  $11^\circ\text{S}$ – $55^\circ\text{N}$ ). Calculation of  
96 dry deposition of Nr species follows a standard big-leaf resistance-in-series model for  
97 gases and aerosols. The aerodynamic resistance to turbulent transfer from the  
98 measurement heights ( $\sim 2$  m) to the roughness height is estimated using the GEOS-5  
99 data. The surface uptake resistance is calculated based on the Global Land Cover  
100 Characteristics Database Version 2.0 ([http://edc2.usgs.gov/glcc/globdoc2\\_0.php](http://edc2.usgs.gov/glcc/globdoc2_0.php)),  
101 which defines land types (e.g., urban and forest) at  $1\text{ km} \times 1\text{ km}$  resolution and is then  
102 binned to the model resolution as a fraction of the grid cell covered by each land type.  
103 The model  $1/2^\circ$  resolution thus coarsely represents regional land characteristics around  
104 the monitoring sites. Bi-directional  $\text{NH}_3$  exchange is not considered in the model.  
105

106 **Table S1** Control measures implemented in Beijing-Tianjin-Hebei during the Olympic  
 107 Games, APEC, Military Parade, and BRS<sup>2</sup>

| Events                             | Provinces |                                                                                                        | Control measures                                                                                                                                 |
|------------------------------------|-----------|--------------------------------------------------------------------------------------------------------|--------------------------------------------------------------------------------------------------------------------------------------------------|
| Olympic Games<br>(Aug. 8–24, 2008) | Beijing   | 1                                                                                                      | Strict and provisional driving restrictions on motor vehicles by odd-even number (for NO <sub>x</sub> and PM <sub>2.5</sub> );                   |
|                                    |           | 2                                                                                                      | Suspended the use of 70% of government motor vehicles (for NO <sub>x</sub> and PM <sub>2.5</sub> );                                              |
|                                    |           | 3                                                                                                      | Stopped some construction site operations (for SO <sub>2</sub> and PM <sub>2.5</sub> );                                                          |
|                                    |           | 4                                                                                                      | More effective road cleaning (for PM <sub>2.5</sub> );                                                                                           |
|                                    |           | 5                                                                                                      | Stopped production and limited production in key polluting enterprises (for SO <sub>2</sub> and NO <sub>x</sub> );                               |
|                                    |           | 6                                                                                                      | Emission pollutants (SO <sub>2</sub> , NO <sub>x</sub> , etc.) decreased by 30% from fuel combustion (for SO <sub>2</sub> and NO <sub>x</sub> ); |
|                                    |           | 7                                                                                                      | Organic emissions at gas stations, tankers, and storage depots reduced (for PM <sub>2.5</sub> );                                                 |
|                                    | Tianjin   | 1                                                                                                      | Strict and provisional driving restrictions on motor vehicles by odd-even number (for NO <sub>x</sub> and PM <sub>2.5</sub> );                   |
|                                    |           | 2                                                                                                      | Some gas stations in key areas stopped refueling operations during key hours (for NO <sub>x</sub> and PM <sub>2.5</sub> );                       |
|                                    |           | 3                                                                                                      | Open burning of straw strictly prohibited (for PM <sub>2.5</sub> and NH <sub>3</sub> );                                                          |
|                                    |           | 4                                                                                                      | Non-electricity coal-fired facilities and small thermal power plants ceased operation (for SO <sub>2</sub> and NO <sub>x</sub> );                |
|                                    |           | 5                                                                                                      | Selected pollutant emissions suspended (for SO <sub>2</sub> and NO <sub>x</sub> );                                                               |
|                                    |           | 6                                                                                                      | Increased road flushing and sprinkling for dust suppression (for PM <sub>2.5</sub> );                                                            |
|                                    | Hebei     | 1                                                                                                      | All production activities related to construction works are suspended (for PM <sub>2.5</sub> );                                                  |
|                                    |           | 2                                                                                                      | Increase in the frequency of road water spraying (for PM <sub>2.5</sub> );                                                                       |
|                                    |           | 3                                                                                                      | Strict control of straw burning and coal burning (for PM <sub>2.5</sub> , NO <sub>x</sub> , SO <sub>2</sub> , and NH <sub>3</sub> );             |
| 4                                  |           | Strengthened the inspection of vehicles entering Beijing (for NO <sub>x</sub> and PM <sub>2.5</sub> ). |                                                                                                                                                  |

|                                      |         |                                                                                                                                             |                                                                                                                                         |
|--------------------------------------|---------|---------------------------------------------------------------------------------------------------------------------------------------------|-----------------------------------------------------------------------------------------------------------------------------------------|
| APEC<br>(Nov. 1–<br>12,<br>2014)     | Beijing | 1                                                                                                                                           | Strict supervision and driving restrictions on motor vehicles (for NO <sub>x</sub> and PM <sub>2.5</sub> );                             |
|                                      |         | 2                                                                                                                                           | Driving ban on 70% of vehicles belonging to government and state-owned enterprises (for NO <sub>x</sub> and PM <sub>2.5</sub> );        |
|                                      |         | 3                                                                                                                                           | All construction sites within the fifth ring road suspended (for PM <sub>2.5</sub> );                                                   |
|                                      |         | 4                                                                                                                                           | Production by coal-fired and industrial companies suspended (for SO <sub>2</sub> and NO <sub>x</sub> );                                 |
|                                      |         | 5                                                                                                                                           | Emission standard of pollutants (SO <sub>2</sub> , NO <sub>x</sub> , etc.) increased by 50% (for SO <sub>2</sub> and NO <sub>x</sub> ); |
|                                      |         | 6                                                                                                                                           | Key roads required to be cleaned at a high frequency every day (for PM <sub>2.5</sub> );                                                |
|                                      |         | 7                                                                                                                                           | Strict control of express deliveries in Beijing (for PM <sub>2.5</sub> );                                                               |
|                                      | Tianjin | 1                                                                                                                                           | 50% of motor vehicles limited and public transit capacity enhanced (for NO <sub>x</sub> and PM <sub>2.5</sub> );                        |
|                                      |         | 2                                                                                                                                           | All production activities related to construction works suspended (for PM <sub>2.5</sub> );                                             |
|                                      |         | 3                                                                                                                                           | Emission standard of pollutants (SO <sub>2</sub> , NO <sub>x</sub> , etc.) increased by 30% (for SO <sub>2</sub> and NO <sub>x</sub> ); |
|                                      |         | 4                                                                                                                                           | Main roads in the central area cleaned once a day (for PM <sub>2.5</sub> );                                                             |
|                                      |         | 5                                                                                                                                           | Strict control of straw burning and coal burning (for PM <sub>2.5</sub> and NH <sub>3</sub> );                                          |
|                                      | Hebei   | 1                                                                                                                                           | Strengthened inspection of vehicles entering Beijing (for NO <sub>x</sub> and PM <sub>2.5</sub> );                                      |
|                                      |         | 2                                                                                                                                           | Real-time monitoring of straw burning and (for PM <sub>2.5</sub> and NH <sub>3</sub> );                                                 |
| 3                                    |         | Emission limits for pollutants increased by 50% in Shijiazhuang (for SO <sub>2</sub> , NO <sub>x</sub> and PM <sub>2.5</sub> );             |                                                                                                                                         |
| 4                                    |         | Construction sites and key enterprises suspended or restricted in key areas (for SO <sub>2</sub> , NO <sub>x</sub> and PM <sub>2.5</sub> ). |                                                                                                                                         |
| Military Parade<br>(Sep. 3,<br>2015) | Beijing | 1                                                                                                                                           | Strict and provisional driving restrictions on motor vehicles by odd-even number (for NO <sub>x</sub> and PM <sub>2.5</sub> );          |
|                                      |         | 2                                                                                                                                           | Driving ban on 80% of vehicles belonging to government and state-owned enterprises (for NO <sub>x</sub> and PM <sub>2.5</sub> );        |



|                                    |         |   |                                                                                                                                                                                         |
|------------------------------------|---------|---|-----------------------------------------------------------------------------------------------------------------------------------------------------------------------------------------|
|                                    |         | 3 | Widespread surprise inspections and rectification of polluting enterprises (for SO <sub>2</sub> , NO <sub>x</sub> and PM <sub>2.5</sub> );                                              |
|                                    |         | 4 | All construction works within the fifth ring road suspended (for PM <sub>2.5</sub> );                                                                                                   |
|                                    |         | 5 | Removed from use 217,000 old vehicles and 244 heavy polluting enterprises in advance (for SO <sub>2</sub> , NO <sub>x</sub> and PM <sub>2.5</sub> );                                    |
|                                    |         | 6 | 58 important roads cleaned at high frequency every day (for PM <sub>2.5</sub> );                                                                                                        |
|                                    |         | 7 | Enhanced supervision of thermal power plants and steel companies in west and south Beijing based on scientific research (for SO <sub>2</sub> , NO <sub>x</sub> and PM <sub>2.5</sub> ); |
|                                    | Tianjin | 1 | Increased emission reduction standard of coal power plants by more than 50% (for SO <sub>2</sub> );                                                                                     |
|                                    |         | 2 | Completed the yellow label car elimination task six months in advance (for NO <sub>x</sub> and PM <sub>2.5</sub> );                                                                     |
|                                    |         | 3 | Strengthened efforts to rectify environmental pollution incidents (for SO <sub>2</sub> , NO <sub>x</sub> and PM <sub>2.5</sub> );                                                       |
|                                    |         | 4 | Cars that did not meet national emission standards were not allowed to enter Beijing (for NO <sub>x</sub> and PM <sub>2.5</sub> );                                                      |
|                                    |         | 5 | Main roads in the central area and Binhai area required to be cleaned once a day (for PM <sub>2.5</sub> );                                                                              |
|                                    | Hebei   | 1 | Set up an inspection team to account for environmental violations (for SO <sub>2</sub> , NO <sub>x</sub> and PM <sub>2.5</sub> );                                                       |
|                                    |         | 2 | Driving restrictions on motor vehicles by odd-even number (for NO <sub>x</sub> and PM <sub>2.5</sub> );                                                                                 |
|                                    |         | 3 | Production of key companies suspended in Baoding and other cities (for SO <sub>2</sub> , NO <sub>x</sub> and PM <sub>2.5</sub> );                                                       |
|                                    |         | 4 | Enhanced the desulfurization facilities in ANSTEEL in Handan (for SO <sub>2</sub> , NO <sub>x</sub> and PM <sub>2.5</sub> );                                                            |
|                                    |         | 5 | All construction works and pollutant companies suspended or restricted (for SO <sub>2</sub> , NO <sub>x</sub> and PM <sub>2.5</sub> ).                                                  |
| Belt and Road<br>(May. 8–17, 2017) | Beijing | 1 | The principle of “non-disturbance of the resident”;                                                                                                                                     |
|                                    |         | 2 | Provisional traffic restrictions on vehicles with dangerous chemicals (for NO <sub>x</sub> and PM <sub>2.5</sub> );                                                                     |
|                                    |         | 3 | Some logistics vehicles are completely banned (for NO <sub>x</sub> and PM <sub>2.5</sub> );                                                                                             |

|         |   |                                                                                                                                                           |
|---------|---|-----------------------------------------------------------------------------------------------------------------------------------------------------------|
|         | 4 | Enterprises that could not meet emissions standards or with excessive emissions suspended (for SO <sub>2</sub> , NO <sub>x</sub> and PM <sub>2.5</sub> ); |
|         | 5 | Set up a special inspection team to ensure air quality (for SO <sub>2</sub> , NO <sub>x</sub> and PM <sub>2.5</sub> );                                    |
| Tianjin | 1 | Strengthened control of coal pollution, industrial pollution and dust pollution (for SO <sub>2</sub> , NO <sub>x</sub> and PM <sub>2.5</sub> );           |
|         | 2 | Strengthened the assessment and accountability mechanism;                                                                                                 |
| Hebei   | 1 | 10-day corporate inspection (for SO <sub>2</sub> , NO <sub>x</sub> and PM <sub>2.5</sub> );                                                               |
|         | 2 | Strengthened environmental law enforcement and data monitoring (for SO <sub>2</sub> , NO <sub>x</sub> and PM <sub>2.5</sub> ).                            |

---

108

109

110 **Table S2** Scenarios of sensitivity of PM<sub>2.5</sub> and N deposition to emission changes<sup>3</sup>

|       | <b>Meteorological conditions</b> | <b>Emission scenarios</b> | <b>Introduction</b>                                                            |
|-------|----------------------------------|---------------------------|--------------------------------------------------------------------------------|
| Base  | FNL_2017                         | MEIC 2017                 | Base                                                                           |
| Case1 | RCP4.5_2030                      | DPEC 2030 NG              | Carbon-neutral climate goals combined with enhanced pollution control policies |
| Case2 | RCP4.5_2060                      | DPEC 2060 NG              |                                                                                |

111

112

113

**Table S3** Duration of pre-event, event window and post-event for each event

|                                                                 | <b>Pre-event</b>    | <b>Event window</b>  | <b>Post-event</b>     |
|-----------------------------------------------------------------|---------------------|----------------------|-----------------------|
| <b>Event 1:</b> Olympics Games (Olympic)                        | Jun. 1-30, 2008     | Aug. 8-24, 2008      | Sep. 24-Oct. 23, 2008 |
| <b>Event 2:</b> Asia-Pacific Economic Cooperation Summit (APEC) | Oct. 1-31, 2014     | Nov. 1-12, 2014      | Nov. 13-Dec. 31, 2014 |
| <b>Event 3:</b> Military Parades (Parade)                       | Aug. 3-19, 2015     | Aug. 20-Sep. 3, 2015 | Sep. 3-29, 2015       |
| <b>Event 4:</b> Belt and Road Summit (BRS)                      | Apr. 28-May 7, 2017 | May 8-17, 2017       | May 18-Jun. 17, 2017  |

114

115

116 **Table S4** Description of China's Nationwide Nitrogen Deposition Monitoring Network  
 117 (NNDMN) sites

| Sub-region      | Sites | Longitude<br>(E°) | Latitude<br>(N°) | Land-use<br>type | Sampling period   |                      |
|-----------------|-------|-------------------|------------------|------------------|-------------------|----------------------|
|                 |       |                   |                  |                  | Dry<br>deposition | Bulk<br>deposition   |
| North China     | NC1   | 116.28            | 40.02            | Urban            | 2011-2020         | 2011-2020            |
|                 | NC2   | 116.37            | 39.96            | Urban            | 2012-2018         | 2012-2020            |
|                 | NC3   | 113.63            | 34.75            | Urban            | 2011-2020         | 2011, 2015-2020      |
|                 | NC4   | 120.40            | 36.32            | Urban            | 2011, 2015-2020   | 2011-2012, 2015-2020 |
|                 | NC5   | 115.48            | 38.85            | Rural            | 2011-2020         | 2011-2020            |
|                 | NC6   | 116.20            | 40.11            | Rural            | 2011-2020         | 2011-2020            |
|                 | NC7   | 116.10            | 39.72            | Rural            | 2011-2020         | 2011-2013, 2016      |
|                 | NC8   | 116.00            | 40.50            | Rural            | 2015-2020         | 2015-2020            |
|                 | NC9   | 114.94            | 36.78            | Rural            | 2011-2020         | 2011-2020            |
|                 | NC10  | 112.89            | 38.05            | Rural            | 2011-2020         | 2011-2020            |
|                 | NC11  | 112.69            | 37.56            | Rural            | 2016-2020         | 2016-2020            |
|                 | NC12  | 108.01            | 34.31            | Rural            | 2011-2019         | 2011-2014, 2017-2019 |
|                 | NC13  | 107.15            | 34.38            | Rural            | 2017-2020         | 2017-2020            |
|                 | NC14  | 116.63            | 36.94            | Rural            | 2014-2020         | 2014-2020            |
|                 | NC15  | 114.07            | 31.83            | Background       | 2014-2017         | 2014-2017            |
|                 | NC16  | 120.75            | 37.93            | Background       | 2011-2020         | 2011-2020            |
|                 | NC17  | 120.18            | 35.77            | Background       | 2011-2020         | 2011-2020            |
| Northwest China | NW1   | 102.60            | 38.07            | Rural            | 2011-2020         | 2011-2019            |
|                 | NW2   | 116.49            | 42.20            | Background       | 2013-2020         | 2013-2020            |
|                 | NW3   | 83.71             | 42.88            | Background       | 2011, 2015-2020   | 2011, 2019-2020      |
|                 | NW4   | 87.56             | 44.17            | Background       | 2015-2020         | 2017-2020            |
| Northeast China | NE1   | 121.58            | 38.92            | Urban            | 2011-2017         | 2011-2017            |
|                 | NE2   | 124.17            | 43.36            | Rural            | 2011-2020         | 2011-2020            |
|                 | NE3   | 124.83            | 43.53            | Rural            | 2011-2020         | 2011-2020            |

|                    |      |        |       |            |           |           |
|--------------------|------|--------|-------|------------|-----------|-----------|
|                    | NE4  | 127.59 | 44.77 | Rural      | 2015-2020 | /         |
| Southeast<br>China | SE1  | 118.97 | 32.12 | Urban      | 2015-2020 | 2015-2020 |
|                    | SE2  | 113.27 | 23.16 | Urban      | 2011-2020 | 2011-2020 |
|                    | SE3  | 121.53 | 29.61 | Rural      | 2011-2020 | 2011-2020 |
|                    | SE4  | 119.22 | 32.12 | Rural      | 2011-2020 | 2011-2020 |
|                    | SE5  | 119.20 | 31.81 | Rural      | 2015-2020 | 2015-2020 |
|                    | SE6  | 120.57 | 32.37 | Rural      | 2016-2018 | 2016-2018 |
|                    | SE7  | 117.56 | 32.88 | Rural      | 2014-2020 | 2014-2020 |
|                    | SE8  | 115.79 | 30.01 | Rural      | 2012-2019 | 2012-2019 |
|                    | SE9  | 112.38 | 30.72 | Rural      | 2016-2019 | 2016-2019 |
|                    | SE10 | 113.09 | 28.19 | Rural      | 2015-2018 | /         |
|                    | SE11 | 111.97 | 28.61 | Rural      | 2011-2020 | 2011-2020 |
|                    | SE12 | 113.41 | 28.21 | Rural      | 2016-2019 | /         |
|                    | SE13 | 113.41 | 28.52 | Rural      | 2011-2020 | 2011-2020 |
|                    | SE14 | 113.34 | 28.56 | Rural      | 2011-2020 | 2011-2020 |
|                    | SE15 | 110.01 | 27.56 | Rural      | 2017-2020 | 2017-2020 |
|                    | SE16 | 110.33 | 21.26 | Rural      | 2011-2020 | 2011-2020 |
|                    | SE17 | 119.36 | 26.17 | Rural      | 2011-2020 | 2011-2020 |
|                    | SE18 | 116.57 | 25.13 | Rural      | 2016-2020 | 2011-2020 |
|                    | SE19 | 117.19 | 16.90 | Rural      | 2016-2020 | 2011-2020 |
|                    | SE20 | 116.35 | 25.83 | Rural      | 2016-2020 | 2011-2018 |
|                    | SE11 | 113.31 | 28.61 | Background | 2011-2020 | 2011-2020 |
|                    | SE22 | 117.98 | 27.63 | Background | 2017-2020 | 2017-2020 |
|                    | SE23 | 118.84 | 32.07 | Background | 2017-2018 | 2017-2018 |
| Southwest<br>China | SW1  | 104.08 | 30.64 | Urban      | 2015-2020 | 2015-2020 |
|                    | SW2  | 103.84 | 30.55 | Rural      | 2011-2020 | 2011-2020 |
|                    | SW3  | 104.04 | 30.61 | Rural      | 2015-2020 | 2015-2020 |
|                    | SW4  | 105.39 | 31.22 | Rural      | 2011-2017 | 2011-2017 |
|                    | SW5  | 106.18 | 29.06 | Rural      | 2013-2020 | 2013-2020 |
|                    | SW6  | 107.90 | 23.05 | Rural      | 2014-2018 | 2014-2018 |
|                    | SW7  | 101.57 | 21.46 | Rural      | 2017-2020 | 2017-2020 |
|                    | SW8  | 102.13 | 29.65 | Background | 2015-2020 | 2015-2020 |

|                           |     |        |       |            |                     |                     |
|---------------------------|-----|--------|-------|------------|---------------------|---------------------|
| Qinghai-<br>Tibet Plateau | TP1 | 101.79 | 36.62 | Urban      | 2014-2020           | 2014-2020           |
|                           | TP2 | 94.36  | 29.65 | Rural      | 2011, 2015-<br>2020 | 2011, 2015-<br>2020 |
|                           | TP3 | 94.49  | 29.57 | Background | 2016-2019           | 2016-2019           |

119

120

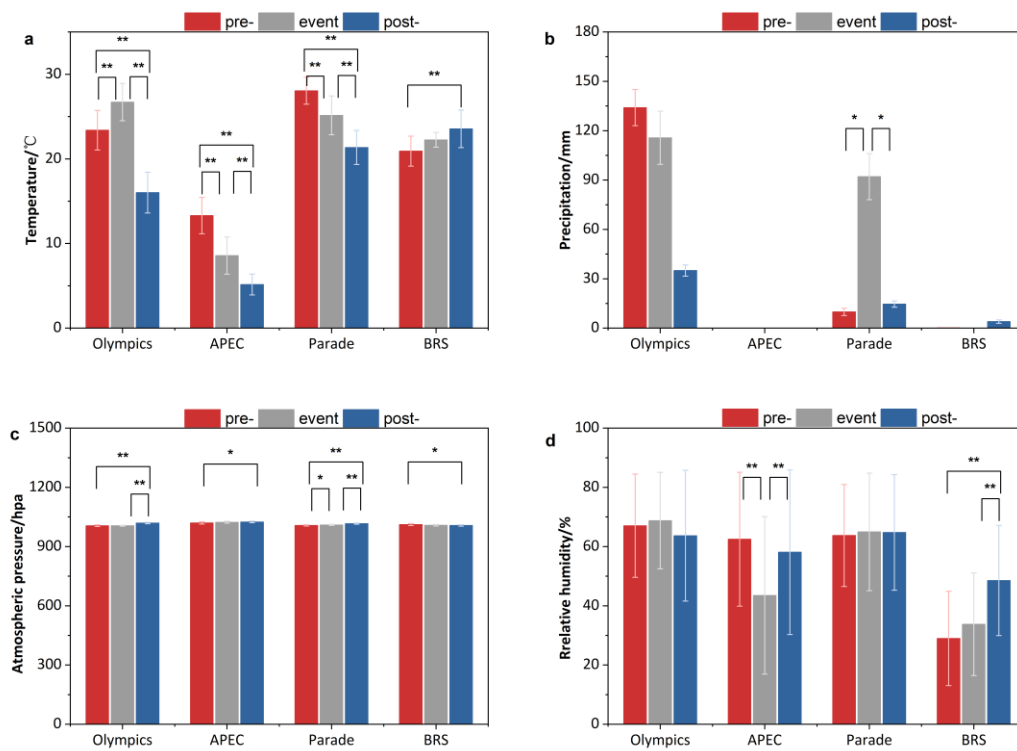

121

122 **Figure S1** Differences in meteorological factors (average  $\pm$  SD). **a:** Temperature, **b:**

123 precipitation, **c:** atmospheric pressure, **d:** relative humidity during the Olympics, APEC,

124 Parade, and BRS. \*:  $p < 0.05$ , \*\*:  $p < 0.01$ . Source data are provided as a Source Data file.

125



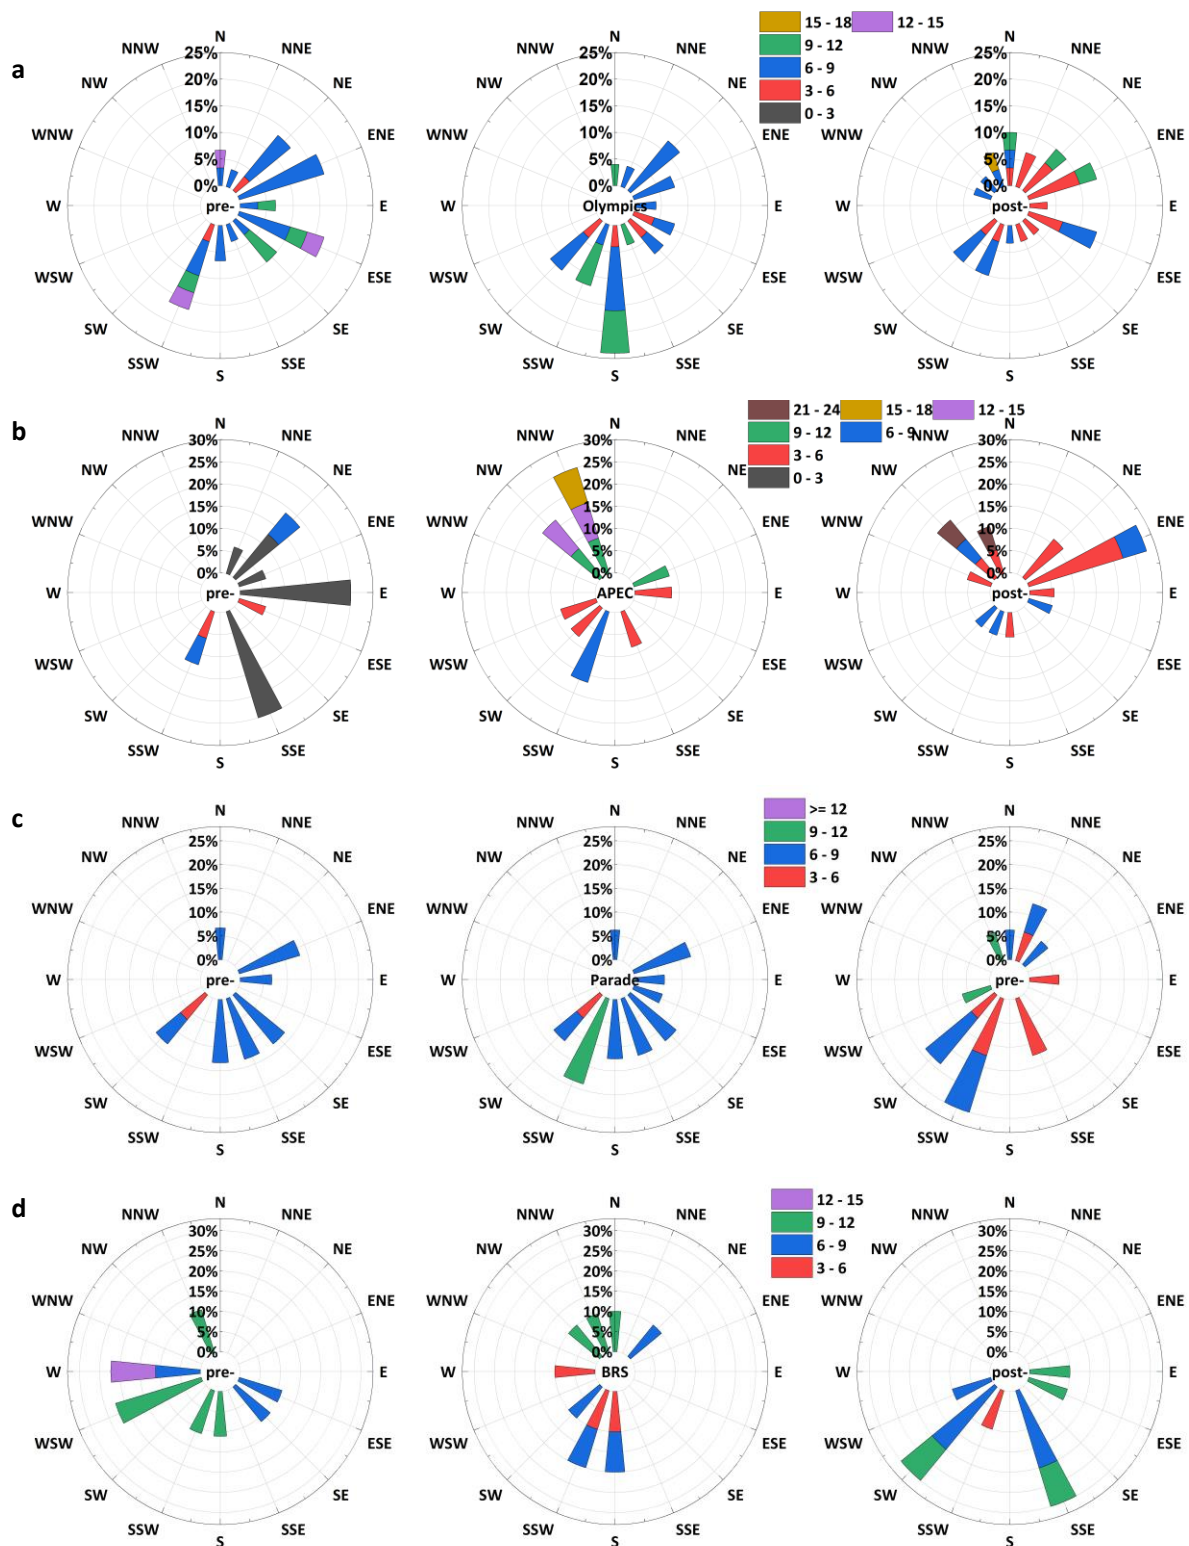

127 **Figure S2** Differences in wind speed (km/h) and direction. **a:** Olympics, **b:** APEC, **c:**  
 128 Parade, **d:** BRS, denoting three subperiods of the pre-event (left), event (middle), and  
 129 post-event (right), respectively. Source data are provided as a Source Data file.

130

131

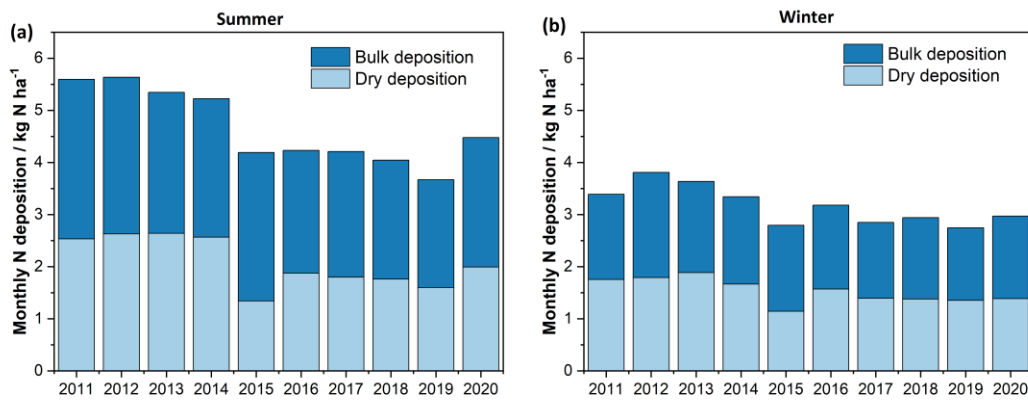

132

133 **Figure S3** Average monthly values of atmospheric N deposition (including bulk  
134 deposition and dry deposition) in summer (a) and winter (b) from 2011 to 2020. Source  
135 data are provided as a Source Data file.

136

137

138

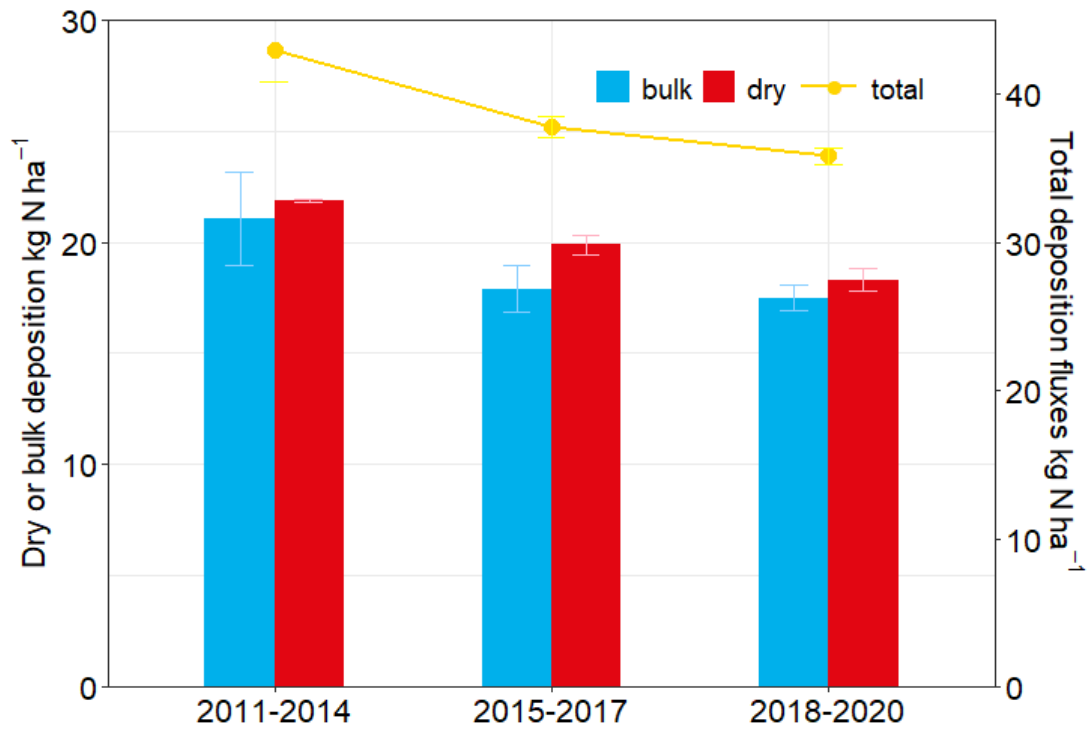

139

140 **Figure S4** Comparison of N deposition (average  $\pm$  SD) over three sampling dates  
141 (2011-2014, 2015-2017, 2018-2020). Source data are provided as a Source Data file.

142

143

144

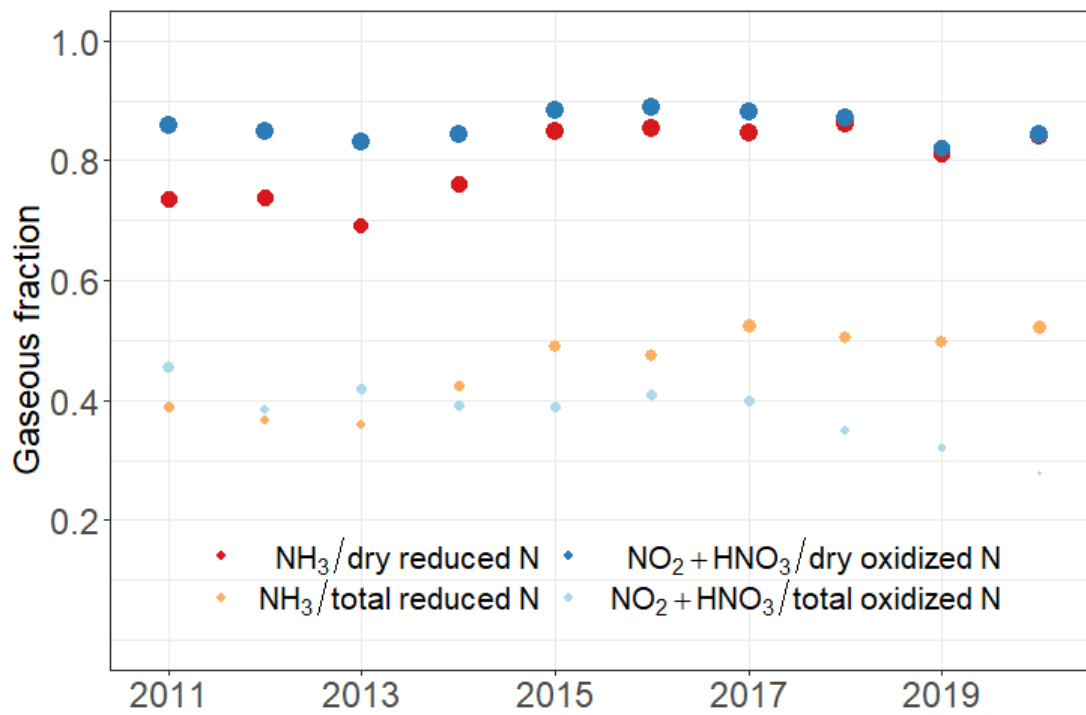

145 **Figure S5** Gaseous fraction of NH<sub>3</sub> in dry reduced N deposition and total reduced N

146 deposition; NO<sub>2</sub> and HNO<sub>3</sub> in oxidized N deposition and total oxidized N deposition.

147 Source data are provided as a Source Data file.

148

149  
150

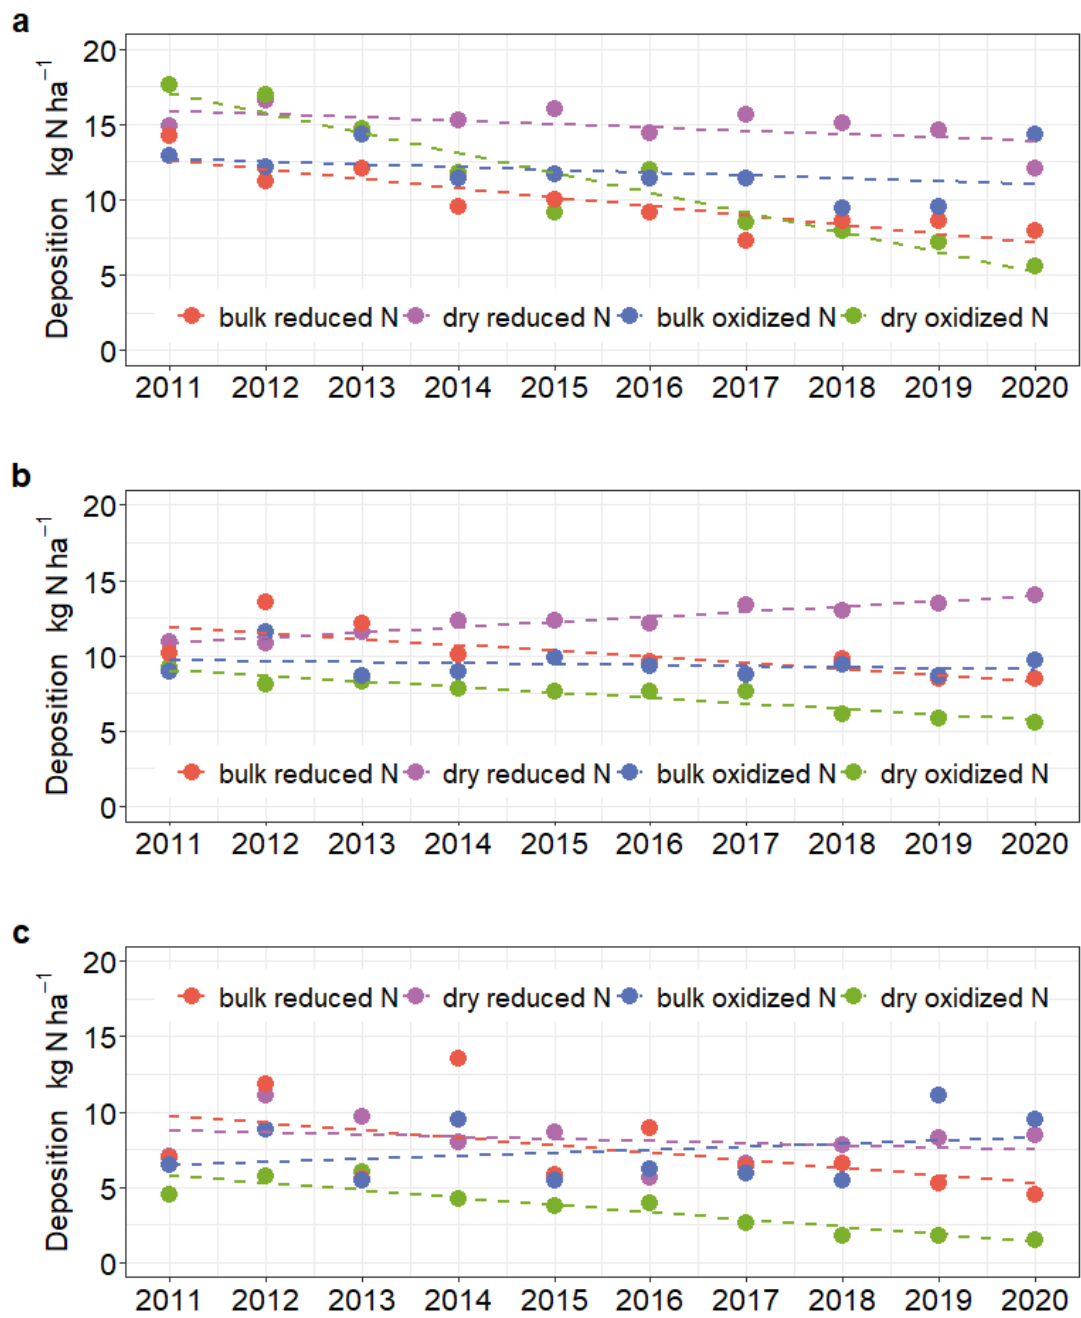

151 **Figure S6** Interannual variation of nitrogen deposition for three land-use types. **a:** urban,  
152 **b:** rural, **c:** background). Source data are provided as a Source Data file.  
153

154

155

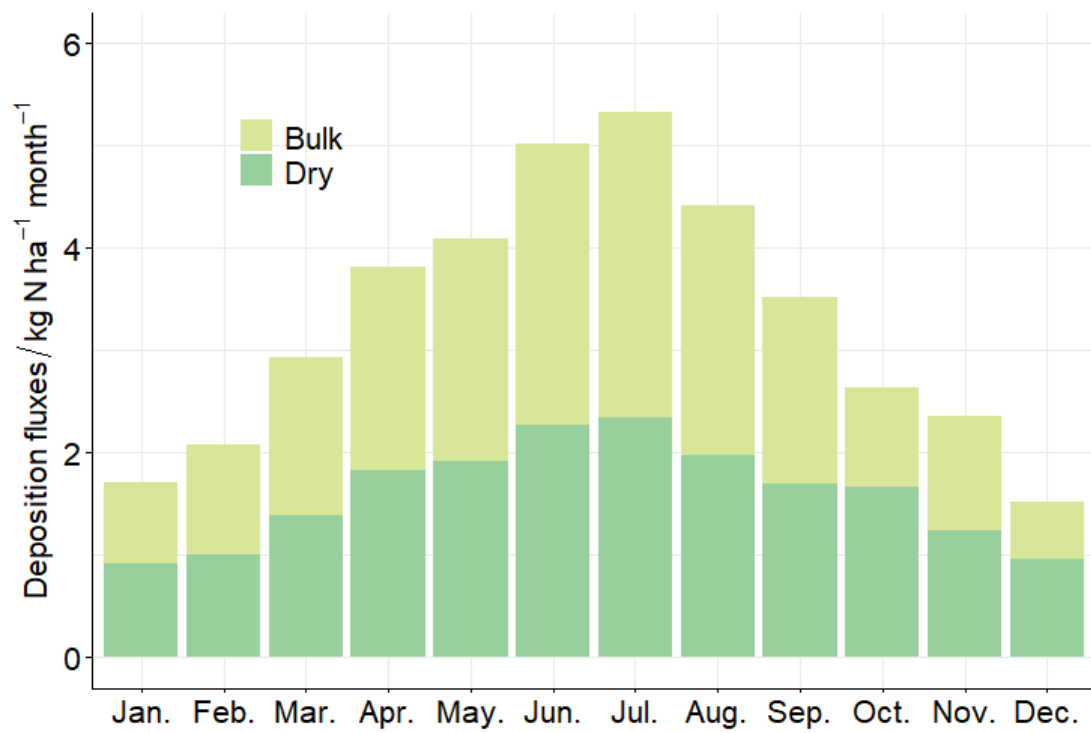

156

157 **Figure S7** Monthly variation of dry and bulk nitrogen deposition. Source data are  
158 provided as a Source Data file.

159

160

161

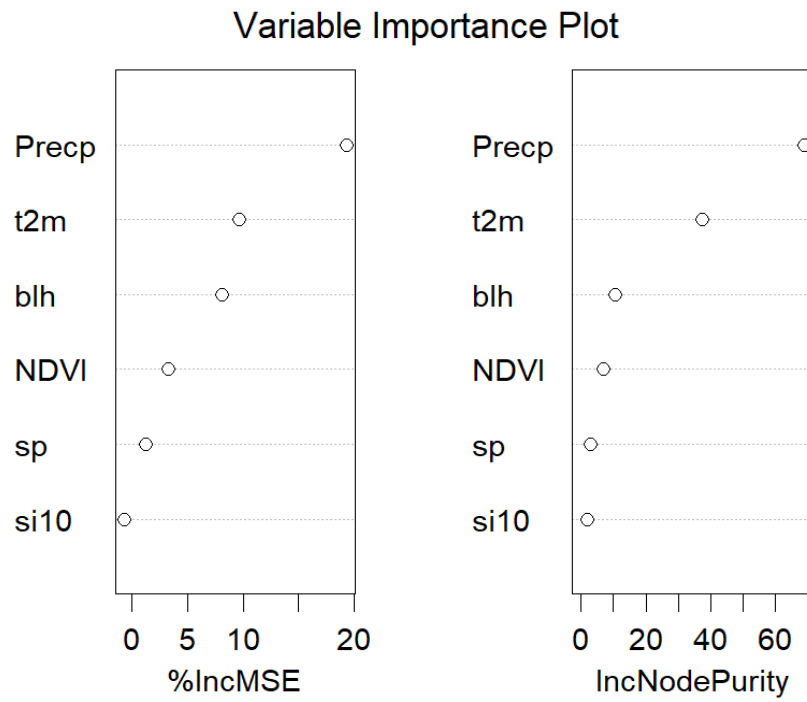

162 **Figure S8** The effect of variables on nitrogen deposition.

163

164

165

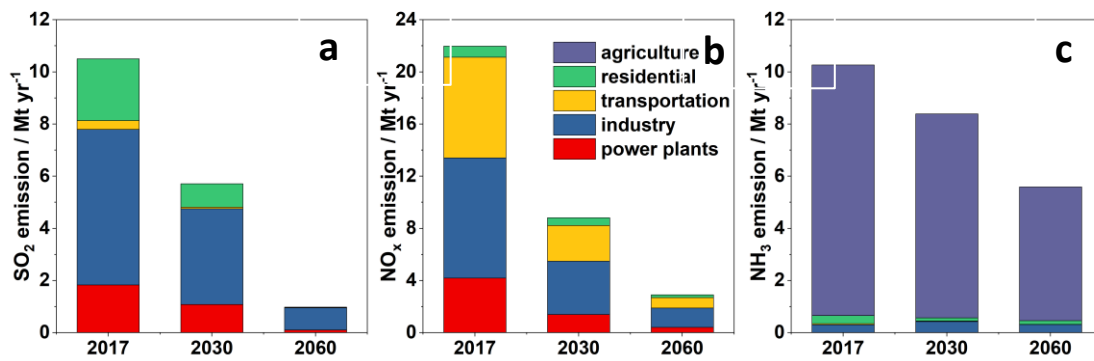

166 **Figure S9** Changes in acid gas (a: NO<sub>x</sub> and b: SO<sub>2</sub>) and c: NH<sub>3</sub> emissions in 2030 and

167 2060 compared with 2017. Source data are provided as a Source Data file.

168



169

170

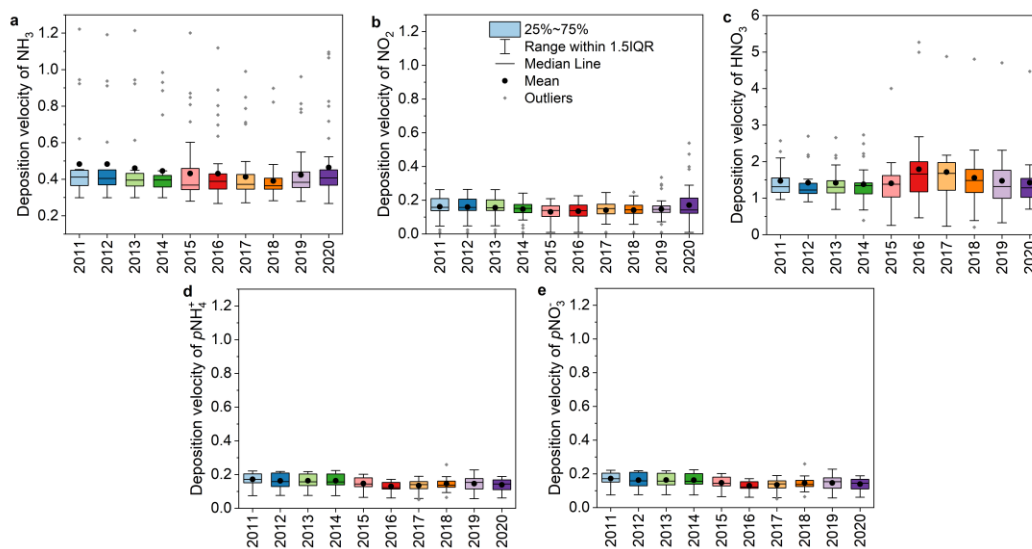

171

172 **Figure S10** Variations in the dry deposition velocities of Nr species. **a:**  $\text{NH}_3$ , **b:**  $\text{NO}_2$ , **c:**

173  $\text{HNO}_3$ , **d:**  $p\text{NH}_4^+$ , **e:**  $p\text{NO}_3^-$ ) at sites within the National Nitrogen Deposition Monitoring

174 Network (NNDMN) from 2011 to 2020. Source data are provided as a Source Data file.

175

176

177

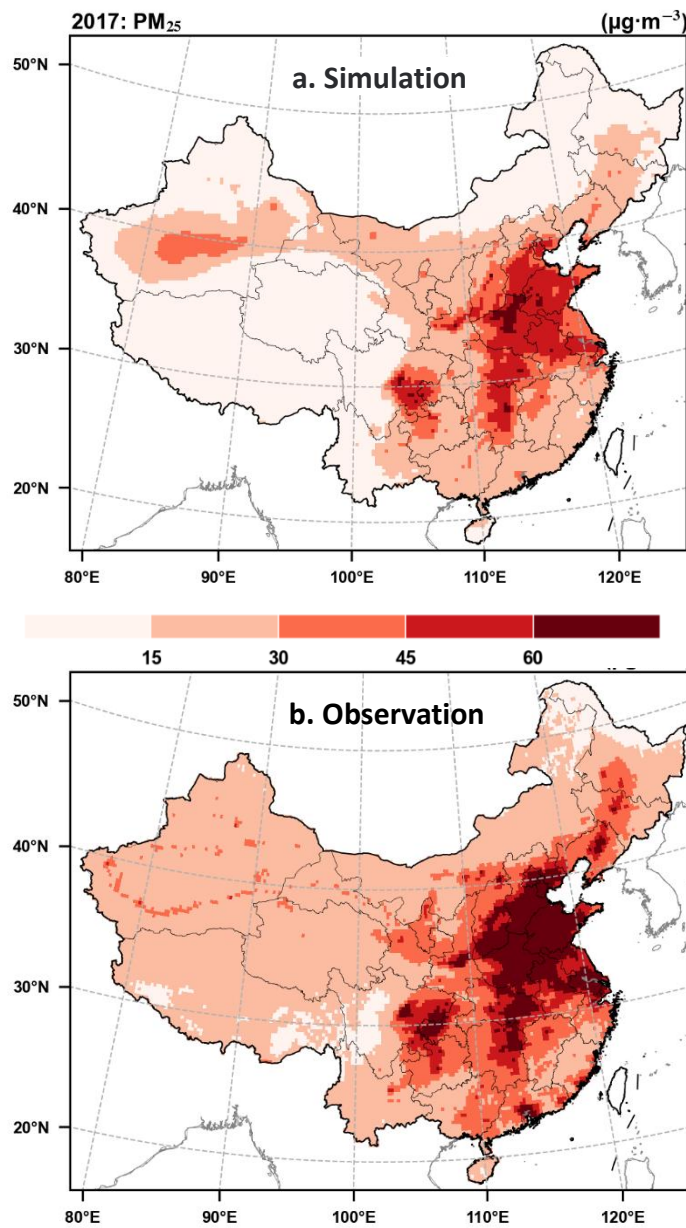

178 **Figure S11** Comparison of simulated (a) and observed (b) PM<sub>2.5</sub> concentrations in  
179 China in 2017. The map data are provided by the Resource and Environment Science  
180 and Data Platform (Xinliang Xu. Multi-year provincial administrative division  
181 boundary data in China. <http://www.resdc.cn/DOI>, 2023. The DOI:  
182 10.12078/2023010103).  
183

184 **Supplementary References**

- 185 1 Pinder, R.W., Dennis, R.L., Bhave, P.V. Observable indicators of the sensitivity of PM<sub>2.5</sub> nitrate  
186 to emission reductions—Part I: Derivation of the adjusted gas ratio and applicability at  
187 regulatory-relevant time scales. *Atmos. Environ.* **42**, 1275-1286 (2008).
- 188 2 Ma, X., Li, C., Dong, X. & Liao, H. Empirical analysis on the effectiveness of air quality control  
189 measures during mega events: Evidence from Beijing, China. *J. Clean Prod.* **271**, 122536  
190 (2020).
- 191 3 Tong, D. et al. Dynamic projection of anthropogenic emissions in China: methodology and  
192 2015–2050 emission pathways under a range of socio-economic, climate policy, and pollution  
193 control scenarios. *Atmos. Chem. Phys.* **20**, 5729-5757 (2020).
